# Supplementary material for: Evaluation of spectral photon counting computed tomography K-edge imaging for determination of gold nanoparticle biodistribution in vivo
Source: Royal Society of Chemistry journal article supplement (doi:10.1039/c7nr01153a), 2017-01-01
Supplement: c7nr01153a1.pdf [file c7nr01153a1.pdf]

## Supporting information for: 'Evaluation of spectral photon counting computed tomography K-edge imaging for determination of gold nanoparticle biodistribution in vivo'

| Organs       | D1           |              | W1           |              | M1           |              | M6           |              |              |              |
|--------------|--------------|--------------|--------------|--------------|--------------|--------------|--------------|--------------|--------------|--------------|
|              | T1           | T2           | ★            | ★            | ★            | ★            | ★            | ★            |              |              |
|              | Mean (mg/ml) | S.D. (mg/ml) |
| Blood        | 4.15         | 0.54         | 3.94         | 0.72         | 0.26         | 0.35         | 0.18         | 0.45         | 0.14         | 0.21         |
| Spleen       | 2.44         | 0.53         | 2.29         | 0.71         | 3.39         | 0.66         | 4.08         | 0.62         | 4.89         | 0.74         |
| Liver        | 1.88         | 0.81         | 1.44         | 0.70         | 1.57         | 0.67         | 1.47         | 0.60         | 1.93         | 0.43         |
| Bone marrow  | 1.59         | 0.61         | 1.57         | 0.63         | 2.86         | 0.51         | 3.56         | 0.41         | 3.08         | 0.94         |
| Kidney       | 1.42         | 0.70         | 1.32         | 0.60         | 0.72         | 0.66         | 0.42         | 0.70         | 0.28         | 0.35         |
| Renal pelvis | 1.84         | 0.80         | 2.41         | 0.78         | 0.62         | 0.57         | 0.06         | 0.97         | 0.19         | 0.21         |
| Brain        | 0.45         | 0.73         | 0.38         | 0.96         | 0.44         | 0.46         | 0.50         | 0.48         | 0.14         | 0.48         |
| Myocardium   | 3.21         | 0.87         | 1.22         | 0.43         | 0.38         | 0.56         | 0.29         | 0.49         | 0.29         | 0.49         |
| Muscle       | 0.65         | 0.53         | 0.58         | 0.50         | 0.29         | 0.42         | 0.33         | 0.56         | 0.36         | 0.58         |
| Lymph nodes  |              |              |              |              | 2.36§        | 0.50§        | 6.69§        | 0.79§        | 7.22§        | 0.49§        |

T1: the first acquisition after gold nanoparticles (AuNP) injection from 30 to 45 seconds. T2: the second acquisition after AuNP injection from 7 to 8 minutes. W1: acquisition at 1 week. M1: acquisition at 1 month. Pre-injection measurements (T0) are not presented in the table. S.D. are standard deviation of the noise in the regions of interest.

★ One imaging session was performed at the 1 week (W1), 1 month (M1) and 6 month (M6) time points.

§ Lymph nodes were observed in the scans at one week, one month and six months.

**Table** AuNP content of several organs (expressed in Au concentration) at various timepoints, as determined from SPCCT image analysis.

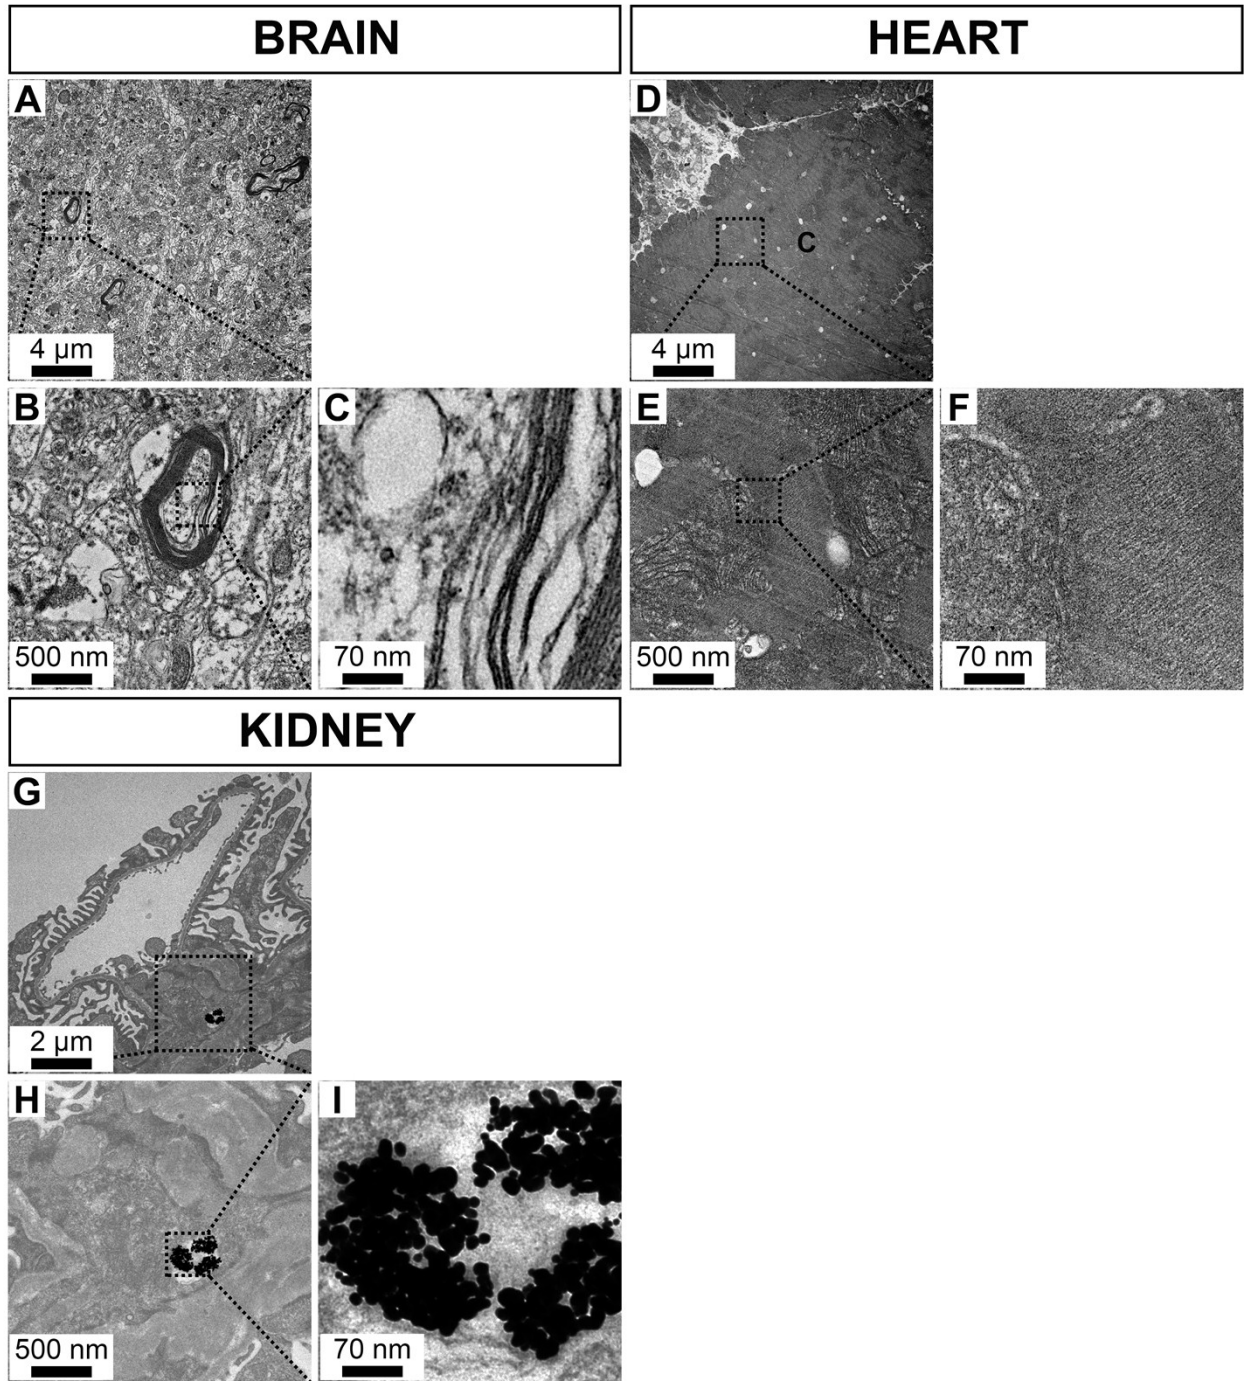

**Figure S1** Transmission electron micrographs of rabbit brain, heart and kidney 6 months after AuNP injection over a range of magnifications. **A-C**: heart (C: cardiomyocyte), **D-F**: brain, **G-I**: kidney.
